# Supplementary material for: Seasonal Dynamics in the Chemistry and Structure of the Fat Bodies of Bumblebee Queens
Source: PubMed Central journal article supplement (PMC4641598; doi:10.1371/journal.pone.0142261), 2015-11-11
Supplement: pone.0142261.s002.pdf [file pone.0142261.s002.pdf]

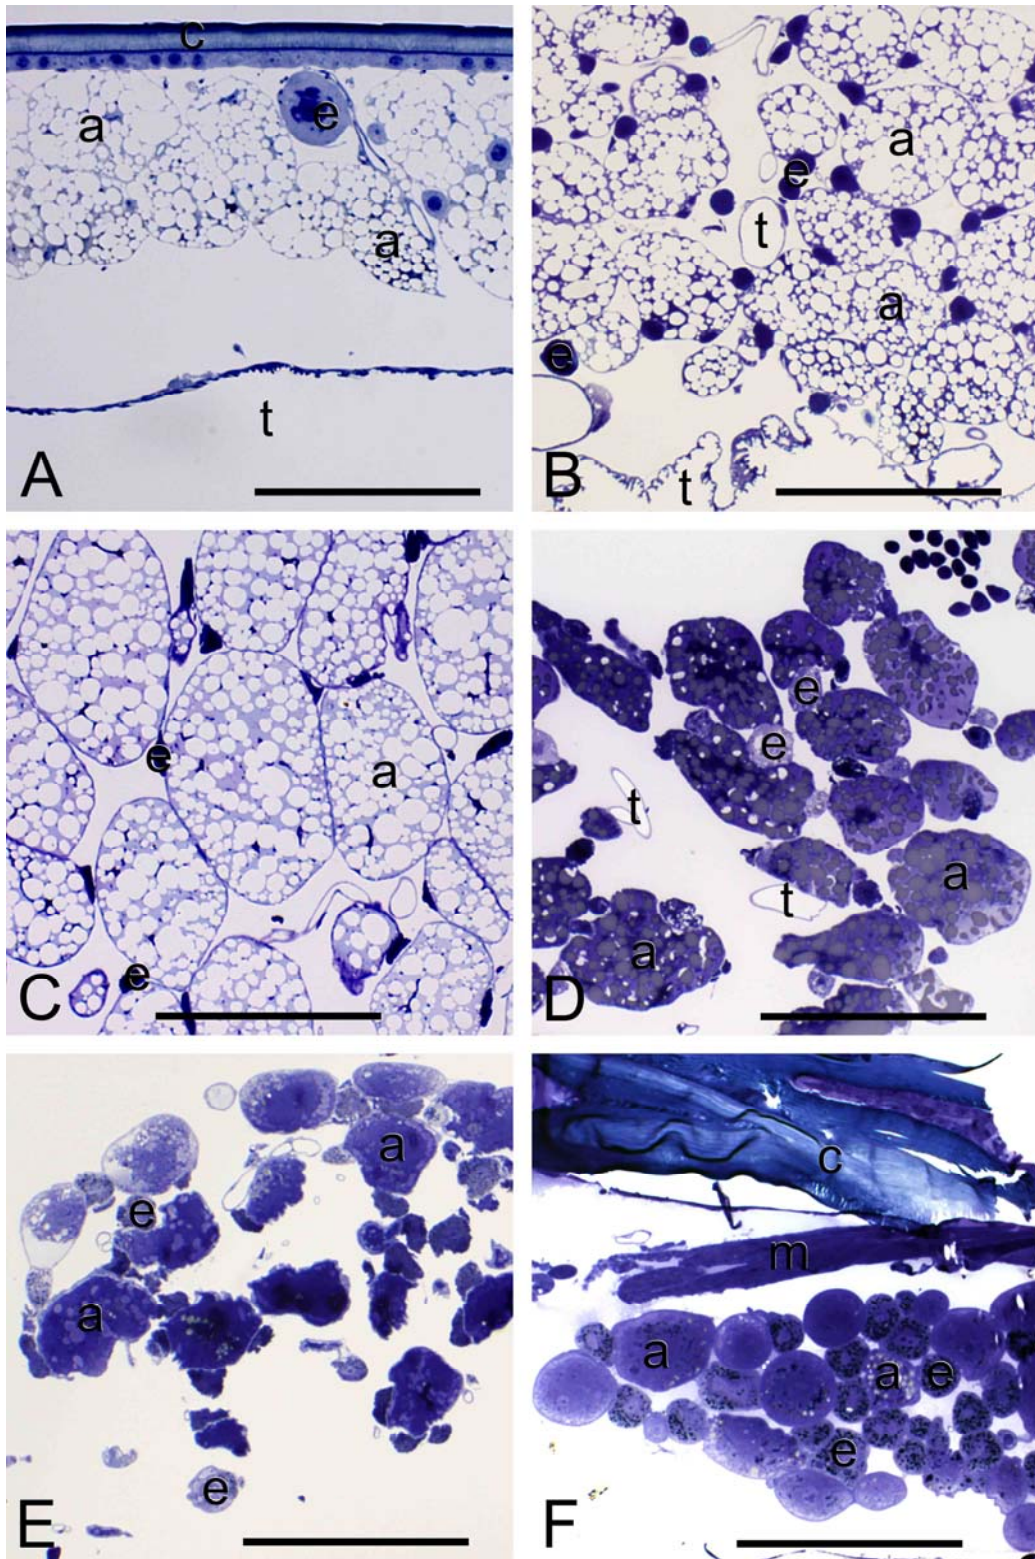

**S1 Fig.** Optical microscopy of the fat body of *B. terrestris* queens, pharate (A), callow (B), before hibernation (C), after hibernation (D), egg-laying (E) and senescent (F). Scale bar represents 200  $\mu\text{m}$ . Abbreviations: a, adipocyte; c, cuticle; e, oenocyte; m, muscle; t, trachea.
