# Supplementary material for: Seasonal Dynamics in the Chemistry and Structure of the Fat Bodies of Bumblebee Queens
Source: PubMed Central journal article supplement (PMC4641598; doi:10.1371/journal.pone.0142261), 2015-11-11
Supplement: pone.0142261.s003.pdf [file pone.0142261.s003.pdf]

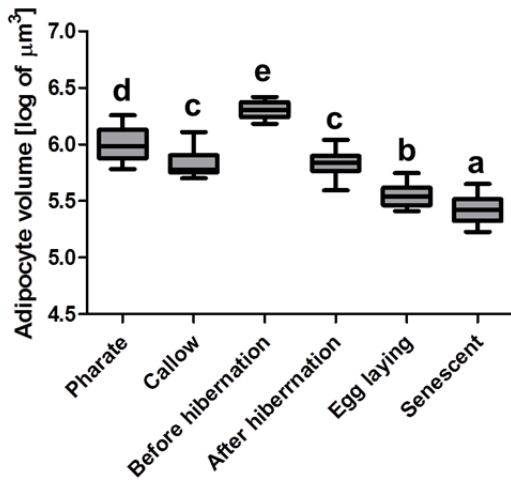

**S2 Fig.** Comparison of the whole adipocytes volumes in particular life stages of *B. terrestris* queens. Whiskers represent the minimum and maximum values of whole cells volumes (n=18). Significantly different groups are indicated by different letters. Log-transformed data were subjected to One-way ANOVA with Tukey's post-hoc multiple comparison test ( $P < 0.0001$ ).
