# Supplementary material for: Seasonal Dynamics in the Chemistry and Structure of the Fat Bodies of Bumblebee Queens
Source: PubMed Central journal article supplement (PMC4641598; doi:10.1371/journal.pone.0142261), 2015-11-11
Supplement: pone.0142261.s004.pdf [file pone.0142261.s004.pdf]

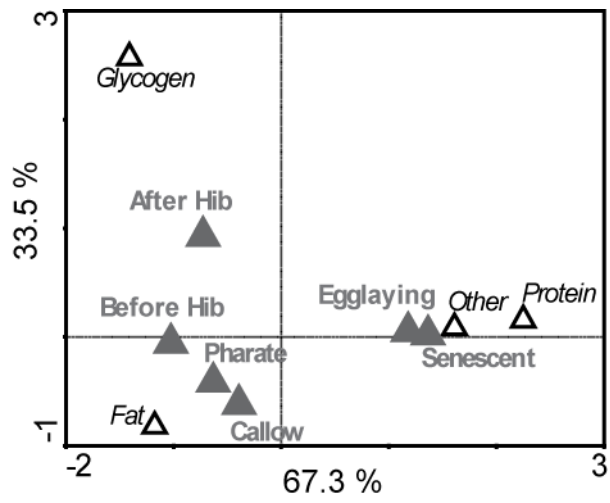

**S3 Fig.** Generated data visualization by CCA analysis shows the relationship between species (empty triangles) and samples (solid triangles).
