# Supplementary material for: Seasonal Dynamics in the Chemistry and Structure of the Fat Bodies of Bumblebee Queens
Source: PubMed Central journal article supplement (PMC4641598; doi:10.1371/journal.pone.0142261), 2015-11-11
Supplement: pone.0142261.s005.pdf [file pone.0142261.s005.pdf]

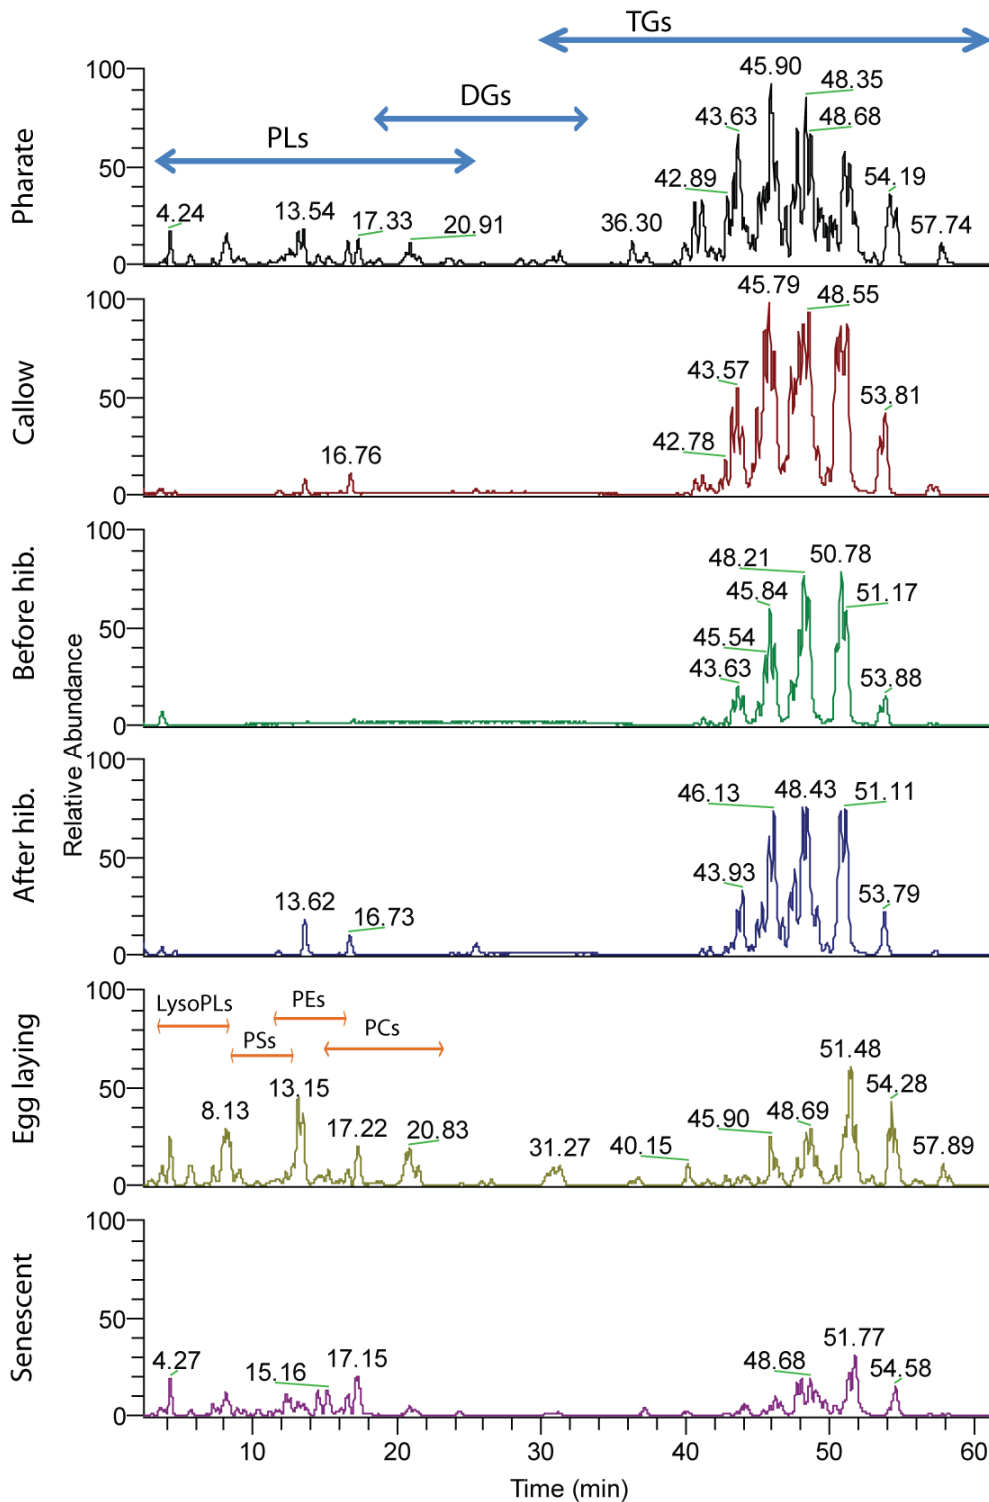

**S4 Fig.** Base peak chromatograms of total lipid extracts of fat bodies obtained from *B. terrestris* queens: pharate, callow, before hibernation, after hibernation, egg-laying, and senescent ones. Bidirectional arrows indicate the expansion of each type of lipid in chromatogram. Abbreviations: DG - diacylglycerols; LysoPL - lysophospholipides; PC – phosphatidylcholines PE - phosphatidylethanolamines; PL - phospholipids; PS - phosphatidylserines; TG- triacylglycerols.
