# Supplementary material for: Seasonal Dynamics in the Chemistry and Structure of the Fat Bodies of Bumblebee Queens
Source: PubMed Central journal article supplement (PMC4641598; doi:10.1371/journal.pone.0142261), 2015-11-11
Supplement: pone.0142261.s007.pdf [file pone.0142261.s007.pdf]

**S1 Table.** Volumes of whole cell, inclusion, and droplets in particular life stages of *B. terrestris* queens. In each stage, 2 queens were selected, size of 9 adipocytes measured in each of them.

|                    | Lipid<br>[ $\mu\text{m}^3$ ] | Glycogen<br>[ $\mu\text{m}^3$ ] | Protein<br>[ $\mu\text{m}^3$ ] | Other<br>[ $\mu\text{m}^3$ ] | Whole cell<br>[ $\mu\text{m}^3$ ] |
|--------------------|------------------------------|---------------------------------|--------------------------------|------------------------------|-----------------------------------|
| Pharate            | 744785                       | 86222                           | 13264                          | 200828                       | 1045099                           |
| Callow             | 487524                       | 912                             | 625                            | 200700                       | 689761                            |
| Before hibernation | 1437412                      | 454054                          | 476                            | 153366                       | 2045309                           |
| After hibernation  | 235588                       | 318880                          | 1350                           | 143471                       | 699290                            |
| Egg laying         | 37711                        | 14357                           | 30336                          | 280702                       | 363106                            |
| Senescent          | 15140                        | 3074                            | 13622                          | 238977                       | 270813                            |
