# Supplementary material for: Seasonal Dynamics in the Chemistry and Structure of the Fat Bodies of Bumblebee Queens
Source: PubMed Central journal article supplement (PMC4641598; doi:10.1371/journal.pone.0142261), 2015-11-11
Supplement: pone.0142261.s008.pdf [file pone.0142261.s008.pdf]

**S2 Table.** Body weight (without abdomen) of queens in different life stages (mean values  $\pm$  standard deviation).

| Life stage         | Body weight [mg]<br>(number of samples) |
|--------------------|-----------------------------------------|
| Pharate            | 95.3 $\pm$ 4.5 (17)                     |
| Callow             | 90.1 $\pm$ 4.7 (27)                     |
| Before hibernation | 118.5 $\pm$ 10.1 (19)                   |
| After hibernation  | 92.2 $\pm$ 7.2 (19)                     |
| Egg-laying         | 109.4 $\pm$ 8.8 (34)                    |
| Senescent          | 112.2 $\pm$ 8.3 (16)                    |
