# Supplementary material for: Seasonal Dynamics in the Chemistry and Structure of the Fat Bodies of Bumblebee Queens
Source: PubMed Central journal article supplement (PMC4641598; doi:10.1371/journal.pone.0142261), 2015-11-11
Supplement: pone.0142261.s009.pdf [file pone.0142261.s009.pdf]

|    |      |                                |       |      |       |      |       |      |       |      |       |      |       |      |
|----|------|--------------------------------|-------|------|-------|------|-------|------|-------|------|-------|------|-------|------|
| 44 | 44:0 | 16:0/12:0/16:0//14:0/14:0/16:0 | 0.56  | 0.23 | 1.08  | 0.17 | 0.00  | 0.00 | 0.03  | 0.02 | 0.20  | 0.26 | 0.91  | 1.12 |
| 44 | 46:1 | 16:0/18:1/12:0//14:0/14:0/18:1 | 9.10  | 0.20 | 5.68  | 2.44 | 0.27  | 0.18 | 1.43  | 0.43 | 2.10  | 1.79 | 5.54  | 4.21 |
| 44 | 48:2 | 18:1/14:0/16:1//16:1/16:1/16:0 | 2.55  | 0.42 | 2.34  | 1.15 | 4.95  | 1.96 | 5.62  | 1.00 | 1.49  | 0.13 | 2.08  | 1.26 |
| 44 | 50:3 | 16:1/16:1/18:1                 | 0.54  | 0.14 | 0.56  | 0.27 | 5.92  | 2.00 | 6.02  | 0.89 | 1.28  | 0.14 | 0.89  | 0.52 |
| 44 | 50:3 | 18:1/18:1/14:1                 | 5.06  | 0.49 | 1.64  | 0.75 | 1.07  | 0.39 | 0.00  | 0.00 | 0.00  | 0.00 | 2.90  | 1.28 |
| 44 | 52:4 | 18:1/18:3/16:0                 | 12.63 | 1.71 | 8.08  | 1.96 | 1.72  | 0.26 | 3.35  | 0.87 | 12.14 | 2.41 | 11.56 | 4.12 |
| 44 | 52:4 | 18:1/18:2/16:1                 | 0.00  | 0.00 | 0.00  | 0.00 | 2.64  | 0.69 | 0.41  | 0.08 | 0.00  | 0.00 | 0.00  | 0.00 |
| 44 | 54:5 | 18:1/18:3/18:1                 | 4.96  | 0.96 | 2.98  | 0.37 | 5.90  | 1.81 | 4.01  | 0.39 | 9.71  | 2.77 | 5.54  | 3.21 |
| 44 | 54:5 | 18:2/ 18:3/ 18:0               | 0.00  | 0.00 | 0.17  | 0.04 | 0.00  | 0.00 | 0.00  | 0.00 | 0.00  | 0.00 | 0.00  | 0.00 |
| 46 | 46:0 | 16:0/14:0/16:0                 | 0.82  | 0.19 | 1.47  | 0.28 | 0.00  | 0.00 | 0.05  | 0.01 | 0.43  | 0.63 | 0.85  | 0.83 |
| 46 | 48:1 | 16:0/18:1/14:0                 | 9.49  | 0.80 | 9.84  | 1.32 | 0.43  | 0.24 | 2.61  | 0.36 | 3.17  | 1.52 | 6.71  | 2.48 |
| 46 | 50:2 | 18:1/16:1/16:0                 | 5.39  | 0.69 | 7.84  | 0.74 | 11.84 | 2.82 | 14.02 | 0.46 | 5.99  | 1.29 | 4.09  | 4.09 |
| 46 | 50:2 | 16:0/16:0/18:2                 | 0.00  | 0.00 | 0.35  | 0.10 | 0.00  | 0.00 | 0.00  | 0.00 | 0.00  | 0.00 | 0.00  | 0.00 |
| 46 | 52:3 | 18:1/16:1/18:1                 | 1.38  | 0.74 | 1.07  | 0.38 | 14.66 | 2.14 | 13.22 | 2.29 | 3.97  | 1.06 | 1.45  | 1.77 |
| 46 | 52:3 | 18:2/ 18:1/ 16:0               | 0.00  | 0.00 | 2.07  | 0.45 | 2.40  | 0.56 | 1.02  | 0.22 | 1.22  | 0.32 | 2.70  | 1.02 |
| 46 | 54:4 | 18:1/18:1/18:2                 | 0.49  | 0.14 | 0.74  | 0.15 | 4.54  | 1.01 | 1.04  | 0.08 | 1.56  | 0.95 | 1.25  | 0.84 |
| 46 | 54:4 | 18:2/18:0/18:2                 | 2.16  | 0.71 | 1.68  | 0.39 | 0.33  | 0.09 | 0.00  | 0.00 | 4.61  | 1.71 | 2.44  | 1.37 |
| 48 | 48:0 | 16:0/16:0/16:0                 | 0.32  | 0.17 | 1.01  | 0.41 | 0.00  | 0.00 | 0.34  | 0.16 | 0.26  | 0.30 | 0.71  | 0.57 |
| 48 | 50:1 | 16:0/18:1/16:0                 | 5.68  | 2.17 | 10.40 | 2.06 | 0.35  | 0.17 | 2.62  | 0.32 | 2.91  | 0.59 | 7.05  | 2.03 |
| 48 | 52:2 | 18:1/18:1/16:0                 | 8.05  | 2.48 | 17.86 | 2.29 | 13.54 | 1.35 | 17.55 | 1.30 | 17.50 | 5.75 | 15.03 | 5.34 |
| 48 | 54:3 | 18:1/18:1/18:1                 | 2.17  | 0.29 | 4.72  | 0.33 | 19.52 | 6.38 | 15.47 | 1.52 | 16.13 | 2.67 | 6.09  | 3.98 |
| 50 | 50:0 | 16:0/18:0/16:0                 | 0.90  | 0.28 | 0.66  | 0.65 | 0.00  | 0.00 | 0.42  | 0.05 | 0.00  | 0.00 | 0.37  | 0.23 |
| 50 | 52:1 | 18:0/18:1/16:0                 | 3.02  | 1.25 | 4.47  | 0.54 | 0.00  | 0.00 | 0.88  | 1.17 | 3.06  | 1.97 | 4.19  | 1.96 |
| 50 | 54:2 | 18:1/18:1/18:0                 | 1.26  | 0.43 | 2.78  | 0.56 | 1.22  | 0.40 | 1.67  | 0.50 | 5.26  | 1.74 | 3.39  | 1.46 |
| 50 | 56:3 | 18:1/20:1/18:1                 | 0.00  | 0.00 | 0.00  | 0.00 | 0.66  | 0.31 | 0.19  | 0.03 | 0.00  | 0.00 | 0.00  | 0.00 |
| 52 | 54:1 | 18:0/18:0/18:1                 | 0.35  | 0.10 | 0.59  | 0.10 | 0.00  | 0.00 | 0.06  | 0.01 | 1.09  | 0.46 | 0.76  | 0.41 |

sd = standard deviation
