# Supplementary material for: Seasonal Dynamics in the Chemistry and Structure of the Fat Bodies of Bumblebee Queens
Source: PubMed Central journal article supplement (PMC4641598; doi:10.1371/journal.pone.0142261), 2015-11-11
Supplement: pone.0142261.s010.pdf [file pone.0142261.s010.pdf]

**S4 Table.** List of most abundant TGs in *B. terrestris* queens' fat bodies showing some proportional trends during the lifespan. Group A is relatively stable, while groups B and C correlated with hibernation period of life (i.e., accumulation for B and consumption for C).

| CN:DB / Triacylglycerols |      |                                | Queen's life phase (relative % in TG fraction) |      |        |      |                    |      |                   |      |            |      |           |      |
|--------------------------|------|--------------------------------|------------------------------------------------|------|--------|------|--------------------|------|-------------------|------|------------|------|-----------|------|
|                          |      |                                | Pharate                                        |      | Callow |      | Before hibernation |      | After hibernation |      | Egg-laying |      | Senescent |      |
|                          |      |                                | Mean                                           | sd   | Mean   | sd   | Mean               | sd   | Mean              | sd   | Mean       | sd   | Mean      | sd   |
| Group A                  | 48:2 | 18:1/14:0/16:1//16:1/16:1/16:0 | 2.6                                            | 0.42 | 2.3    | 1.15 | 4.9                | 1.96 | 5.6               | 1.00 | 1.5        | 0.13 | 2.1       | 1.26 |
|                          | 54:5 | 18:1/18:3/18:1                 | 5.0                                            | 0.96 | 3.0    | 0.37 | 5.9                | 1.81 | 4.0               | 0.39 | 9.7        | 2.77 | 5.5       | 3.21 |
|                          | 52:2 | 18:1/18:1/16:0                 | 8.1                                            | 2.48 | 17.9   | 2.29 | 13.5               | 1.35 | 17.6              | 1.30 | 17.5       | 5.75 | 15.0      | 5.34 |
| Group B                  | 50:3 | 16:1/16:1/18:1                 | 0.5                                            | 0.14 | 0.6    | 0.27 | 5.9                | 2.00 | 6.0               | 0.89 | 1.3        | 0.14 | 0.9       | 0.52 |
|                          | 50:2 | 18:1/16:1/16:0                 | 5.4                                            | 0.69 | 7.8    | 0.74 | 11.8               | 2.82 | 14.0              | 0.46 | 6.0        | 1.29 | 4.1       | 4.09 |
|                          | 52:3 | 18:1/16:1/18:1                 | 1.4                                            | 0.74 | 1.1    | 0.38 | 14.7               | 2.14 | 13.2              | 2.29 | 4.0        | 1.06 | 1.4       | 1.77 |
|                          | 54:3 | 18:1/18:1/18:1                 | 2.2                                            | 0.29 | 4.7    | 0.33 | 19.5               | 6.38 | 15.5              | 1.52 | 16.1       | 2.67 | 6.1       | 3.98 |
| Group C                  | 46:1 | 16:0/18:1/12:0//14:0/14:0/18:1 | 9.1                                            | 0.20 | 5.7    | 2.44 | 0.3                | 0.18 | 1.4               | 0.43 | 2.1        | 1.79 | 5.5       | 4.21 |
|                          | 52:4 | 18:1/18:3/16:0                 | 12.6                                           | 1.71 | 8.1    | 1.96 | 1.7                | 0.26 | 3.3               | 0.87 | 12.1       | 2.41 | 11.6      | 4.12 |
|                          | 48:1 | 16:0/18:1/14:0                 | 9.5                                            | 0.80 | 9.8    | 1.32 | 0.4                | 0.24 | 2.6               | 0.36 | 3.2        | 1.52 | 6.7       | 2.48 |
|                          | 50:1 | 16:0/18:1/16:0                 | 5.7                                            | 2.17 | 10.4   | 2.06 | 0.4                | 0.17 | 2.6               | 0.32 | 2.9        | 0.59 | 7.1       | 2.03 |

sd = standard deviation
