# Supplementary material for: Seasonal Dynamics in the Chemistry and Structure of the Fat Bodies of Bumblebee Queens
Source: PubMed Central journal article supplement (PMC4641598; doi:10.1371/journal.pone.0142261), 2015-11-11
Supplement: pone.0142261.s011.pdf [file pone.0142261.s011.pdf]

**S5 Table.** List of fatty acid (FA) composition of intact TG molecules and recalculated ratio of particular FA in fat bodies of *B. terrestris* queens in different life phases (relative %).

| FA   | Queen's life phase |      |        |      |                    |      |                   |      |            |      |           |      |
|------|--------------------|------|--------|------|--------------------|------|-------------------|------|------------|------|-----------|------|
|      | Pharate            |      | Callow |      | Before hibernation |      | After hibernation |      | Egg-laying |      | Senescent |      |
|      | Mean               | sd   | Mean   | sd   | Mean               | sd   | Mean              | sd   | Mean       | sd   | Mean      | sd   |
| 12:0 | 2.20               | 0.24 | 1.45   | 0.42 | 0.12               | 0.08 | 0.32              | 0.10 | 0.57       | 0.48 | 1.44      | 1.13 |
| 12:1 | 0.13               | 0.03 | 0.00   | 0.00 | 0.00               | 0.00 | 0.00              | 0.00 | 0.01       | 0.01 | 0.04      | 0.04 |
| 14:0 | 10.68              | 1.51 | 8.87   | 0.25 | 1.83               | 0.80 | 3.32              | 0.81 | 2.99       | 2.04 | 7.40      | 5.17 |
| 14:1 | 1.89               | 0.19 | 0.63   | 0.26 | 0.45               | 0.14 | 0.10              | 0.03 | 0.03       | 0.05 | 1.10      | 0.53 |
| 16:0 | 17.50              | 1.66 | 24.07  | 1.30 | 11.15              | 1.55 | 15.73             | 0.67 | 15.68      | 0.86 | 19.94     | 1.56 |
| 16:1 | 11.79              | 0.30 | 7.14   | 0.74 | 19.42              | 4.48 | 18.90             | 1.44 | 6.50       | 0.54 | 7.84      | 2.55 |
| 18:0 | 1.96               | 0.70 | 3.08   | 0.52 | 0.41               | 0.13 | 1.03              | 0.55 | 3.50       | 1.49 | 3.16      | 1.08 |
| 18:1 | 33.69              | 1.64 | 40.33  | 0.92 | 57.03              | 6.46 | 52.74             | 2.32 | 53.31      | 4.76 | 41.55     | 7.57 |
| 18:2 | 6.33               | 0.93 | 3.97   | 0.90 | 5.82               | 0.90 | 2.39              | 0.21 | 5.73       | 1.74 | 5.32      | 1.04 |
| 18:3 | 7.31               | 1.18 | 4.30   | 0.90 | 3.06               | 0.60 | 2.80              | 0.24 | 7.44       | 1.41 | 6.66      | 1.84 |
| 20:1 | 0.00               | 0.00 | 0.00   | 0.00 | 0.22               | 0.10 | 0.06              | 0.01 | 0.00       | 0.00 | 0.00      | 0.00 |
| 20:3 | 0.00               | 0.00 | 0.00   | 0.00 | 0.10               | 0.04 | 0.09              | 0.02 | 0.00       | 0.00 | 0.14      | 0.12 |

sd = standard deviation
