# Supplementary material for: Seasonal Dynamics in the Chemistry and Structure of the Fat Bodies of Bumblebee Queens
Source: PubMed Central journal article supplement (PMC4641598; doi:10.1371/journal.pone.0142261), 2015-11-11
Supplement: pone.0142261.s012.pdf [file pone.0142261.s012.pdf]

**S6 Table.** The phospholipid membrane composition of fat body of *B. terrestris* queens before and during hibernation obtained by HPLC/MS-ESI technique (relative % in phospholipid fraction; n = 5). PE, phosphatidylethanolamine; PC, phosphatidylcholine; PS, phosphatidylserine.

| Substance    | Before hibernation |      | During hibernation |      |
|--------------|--------------------|------|--------------------|------|
|              | mean               | std  | mean               | std  |
| Lyso PE 18:3 | 0.09               | 0.08 | 0.20               | 0.15 |
| Lyso PE 18:2 | 0.14               | 0.17 | 0.32               | 0.35 |
| Lyso PE 18:1 | 1.09               | 1.08 | 2.16               | 2.18 |
| Lyso PC 16:0 | 0.67               | 1.08 | 0.78               | 0.82 |
| Lyso PC 18:2 | 0.20               | 0.17 | 0.79               | 0.96 |
| Lyso PC 18:1 | 2.41               | 3.72 | 6.51               | 6.24 |
| PE 16:1/16:1 | 0.03               | 0.03 | 0.06               | 0.08 |
| PE 16:0/16:1 | 0.19               | 0.15 | 0.15               | 0.19 |
| PE 16:1/18:2 | 0.08               | 0.08 | 0.11               | 0.08 |
| PE 16:0/18:3 | 0.01               | 0.01 | 0.00               | 0.00 |
| PE 16:1/18:1 | 0.83               | 0.45 | 0.46               | 0.42 |
| PE 16:0/18:1 | 2.16               | 0.75 | 2.56               | 0.75 |
| PE 17:0/18:3 | 0.99               | 0.40 | 1.36               | 0.88 |
| PE 17:0/18:2 | 0.18               | 0.21 | 0.35               | 0.38 |
| PE 17:1/18:1 | 0.41               | 0.21 | 0.38               | 0.41 |
| PE 17:0/18:1 | 0.31               | 0.20 | 0.27               | 0.19 |
| PE 18:3/18:3 | 0.07               | 0.06 | 0.01               | 0.02 |
| PE 18:3/18:2 | 0.04               | 0.07 | 0.01               | 0.03 |
| PE 18:3/18:1 | 1.87               | 1.34 | 1.46               | 0.49 |
| PE 18:2/18:1 | 0.37               | 0.34 | 0.43               | 0.23 |
| PE 18:3/18:0 | 0.61               | 0.39 | 0.50               | 0.15 |
| PE 18:1/18:1 | 15.48              | 3.01 | 9.88               | 4.02 |
| PE 18:2/18:0 | 0.09               | 0.07 | 0.36               | 0.18 |
| PE 18:1/18:0 | 2.79               | 0.99 | 2.15               | 0.53 |
| PC 16:1/16:1 | 0.33               | 0.09 | 0.12               | 0.09 |
| PC 16:1/18:3 | 0.13               | 0.13 | 0.05               | 0.03 |
| PC 16:0/18:3 | 0.06               | 0.08 | 0.01               | 0.01 |
| PC 16:1/18:1 | 6.41               | 1.37 | 3.20               | 0.99 |
| PC 16:0/18:1 | 9.50               | 1.15 | 6.12               | 1.49 |
| PC 18:3/18:3 | 0.59               | 0.78 | 0.10               | 0.08 |
| PC 18:2/18:3 | 0.27               | 0.32 | 0.27               | 0.14 |
| PC 18:1/18:3 | 6.03               | 2.41 | 4.18               | 1.02 |
| PC 18:1/18:2 | 3.18               | 0.46 | 5.78               | 1.85 |
| PC 18:0/18:3 | 0.29               | 0.18 | 1.19               | 1.29 |
| PC 18:1/18:1 | 38.22              | 4.91 | 42.70              | 7.49 |
| PC 18:0/18:1 | 2.03               | 0.39 | 3.06               | 1.25 |
| PS 18:2/18:2 | 0.05               | 0.05 | 0.09               | 0.05 |
| PS 18:0/18:3 | 0.27               | 0.23 | 0.10               | 0.12 |
| PS 18:1/18:1 | 0.91               | 0.29 | 1.31               | 0.58 |
| PS 18:0/18:1 | 0.27               | 0.30 | 0.22               | 0.18 |
